# Supplementary material for: Growth of vertically aligned Co3S4/CoMo2S4 ultrathin nanosheets on reduced graphene oxide as a high-performance supercapacitor electrode
Source: Royal Society of Chemistry journal article supplement (doi:10.1039/c6ta07898b), 2016-01-01
Supplement: c6ta07898b1.pdf [file c6ta07898b1.pdf]

## Supporting Information

### **Growth of Vertically Aligned $\text{Co}_3\text{S}_4/\text{CoMo}_2\text{S}_4$ Ultrathin Nanosheets on Reduced Graphene Oxide as High- performance Supercapacitor Electrode**

Xijia Yang,<sup>1</sup> Haiming Sun,<sup>1</sup> Ping Zan, Lijun Zhao\* and Jianshe Lian\*

Key Lab of Automobile Materials, Ministry of Education, College of Materials  
Science and Engineering, Jilin University, Nanling Campus, Changchun, 130025,  
P.R. China.

E-mail: [lijunzhao@jlu.edu.cn](mailto:lijunzhao@jlu.edu.cn); [lianjs@jlu.edu.cn](mailto:lianjs@jlu.edu.cn);

Fax: +86-431-85095876

## Supporting Figures

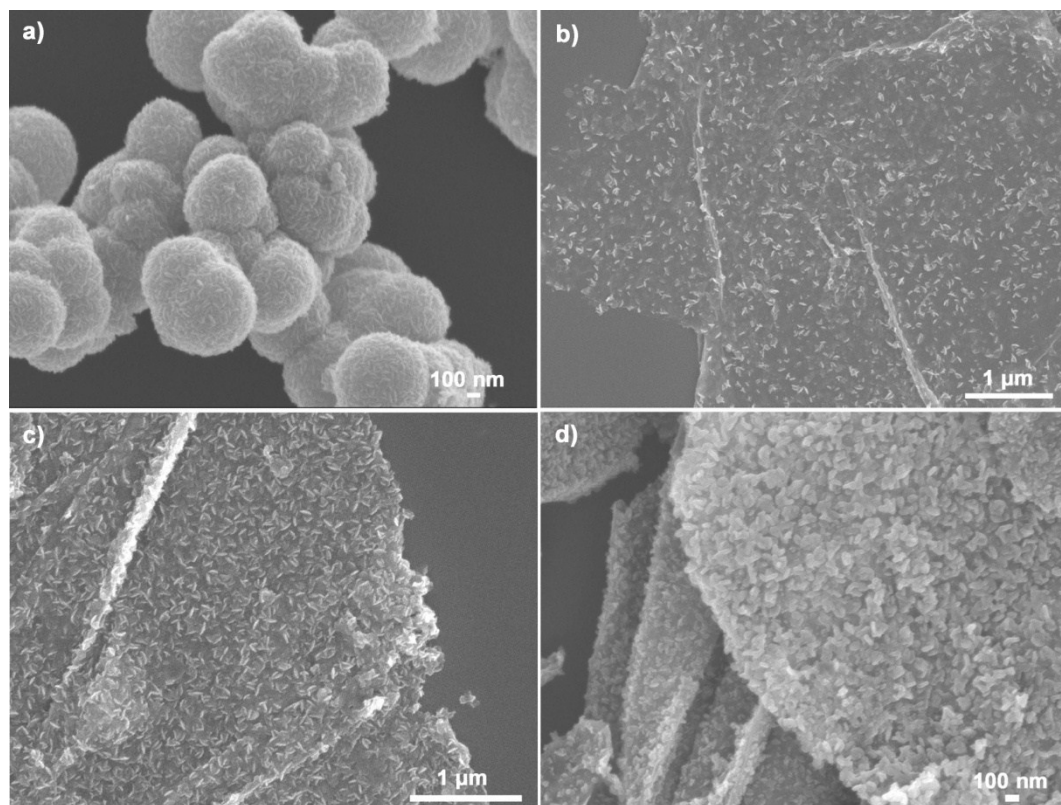

**Fig. S1** FE-SEM images of a) the CMS nanoparticles; b) the CMS-rGO hybrid (rGO 15%), c) the CMS-rGO hybrid (rGO 7.5%), d) the CMS-rGO hybrid (rGO 5%).

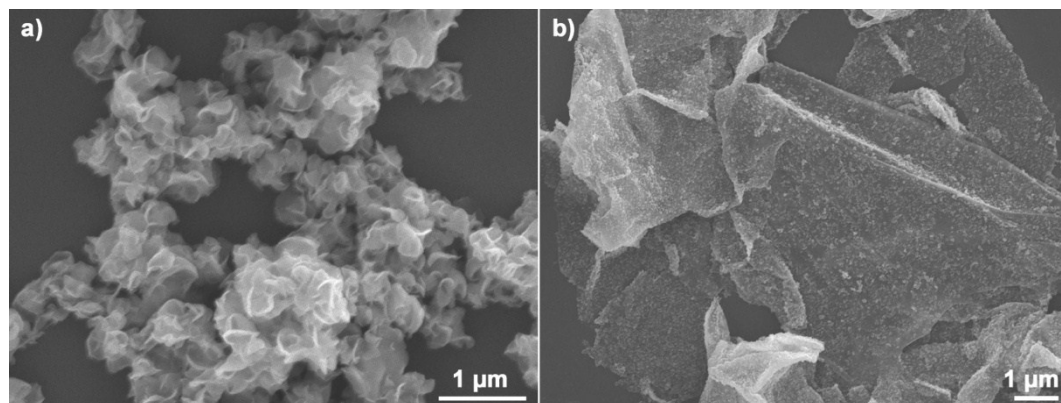

**Fig. S2** FE-SEM images of a) the MoS<sub>2</sub>-rGO hybrid, b) the Co<sub>3</sub>S<sub>4</sub>-rGO hybrid.

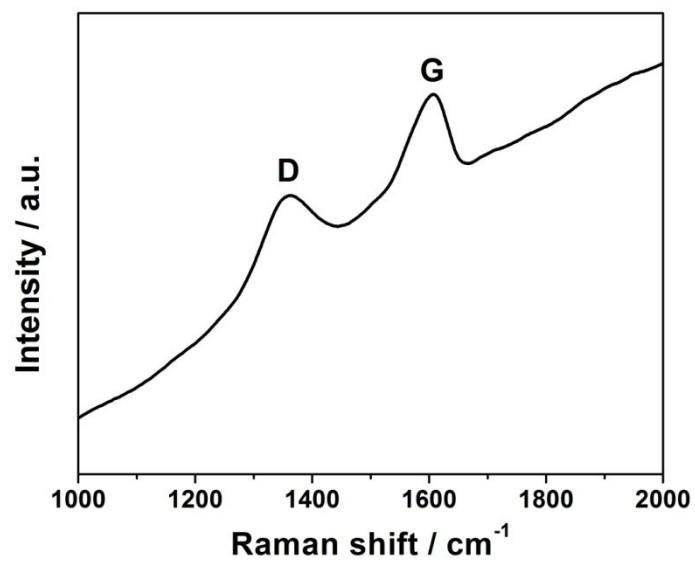

Fig. S3 Raman spectrum of the as-prepared GO.

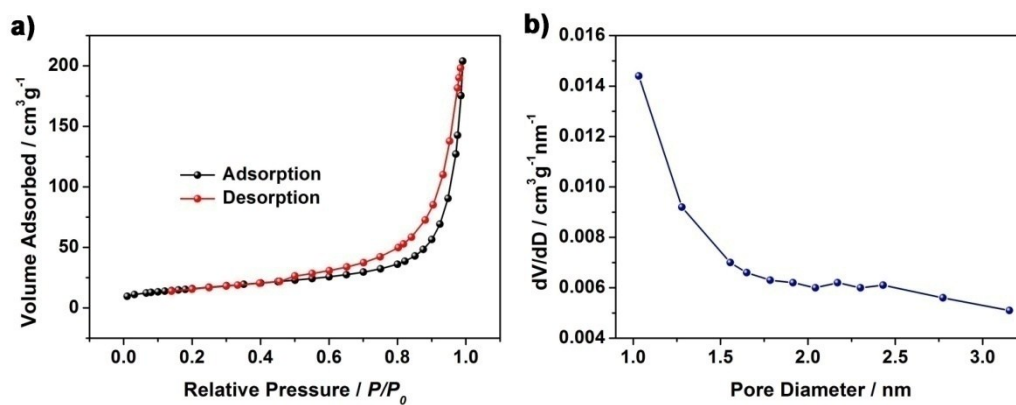

Fig. S4 a)  $\text{N}_2$  adsorption–desorption isotherm and b) pore-size distribution curve of the as-obtained CMS-rGO hybrid.

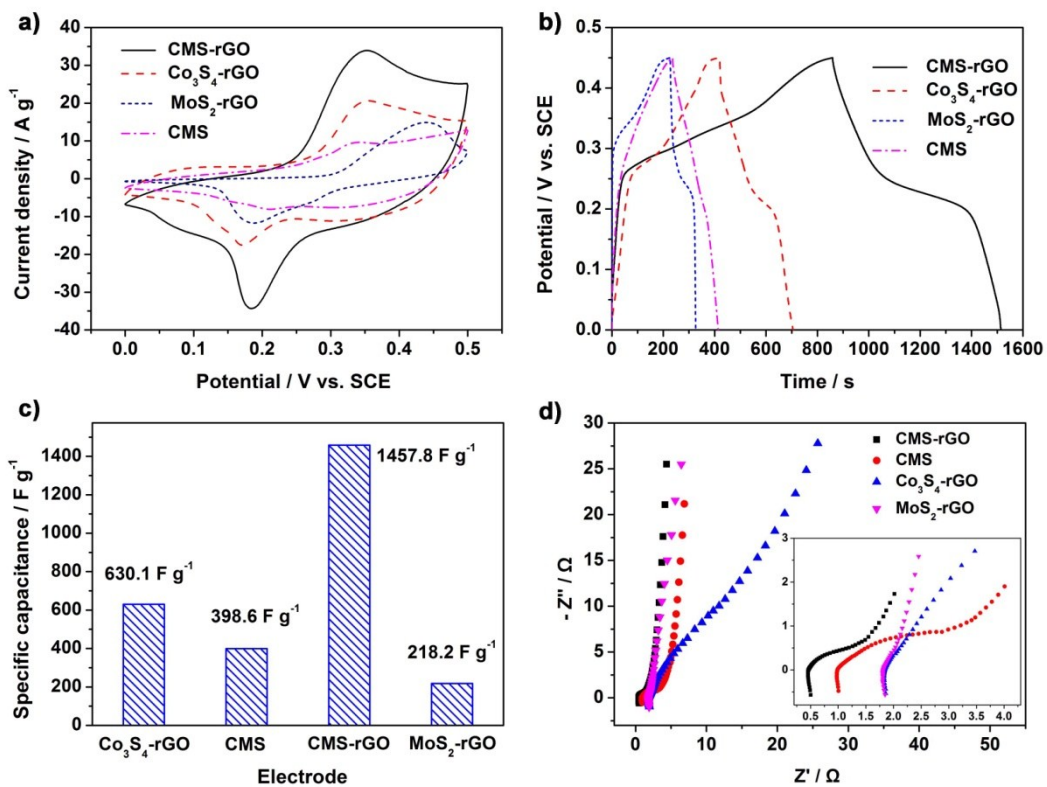

**Fig. S5** a) CV curves at the scanning rates of  $20 \text{ mV s}^{-1}$ ; b) charge-discharge curves and c) the calculated specific capacitance of the CMS-rGO, CMS,  $\text{Co}_3\text{S}_4$ -rGO, and  $\text{MoS}_2$ -rGO electrode. d) Nyquist plots of the CMS-rGO, CMS,  $\text{Co}_3\text{S}_4$ -rGO,  $\text{MoS}_2$ -rGO electrode.

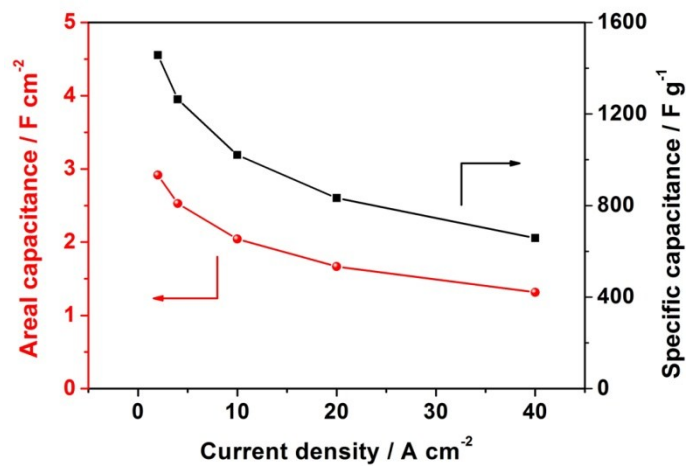

**Fig. S6** Specific and areal capacitance of the electrode of CMS-rGO at different current densities.

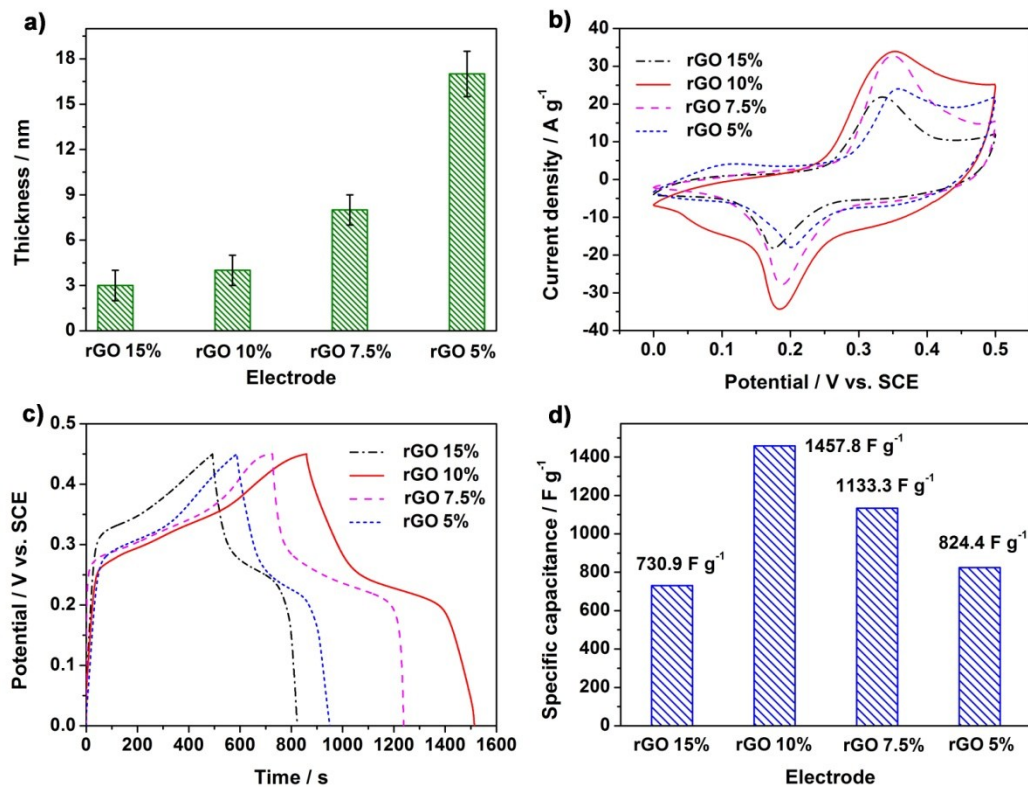

**Fig. S7** a) CMS thickness; b) CV curves at the scanning rates of 20  $\text{mV s}^{-1}$ ; c) charge-discharge curves and d) the calculated specific capacitance of the CMS-rGO (rGO 15%), rGO 10%, rGO 7.5%, and rGO 5% electrode.

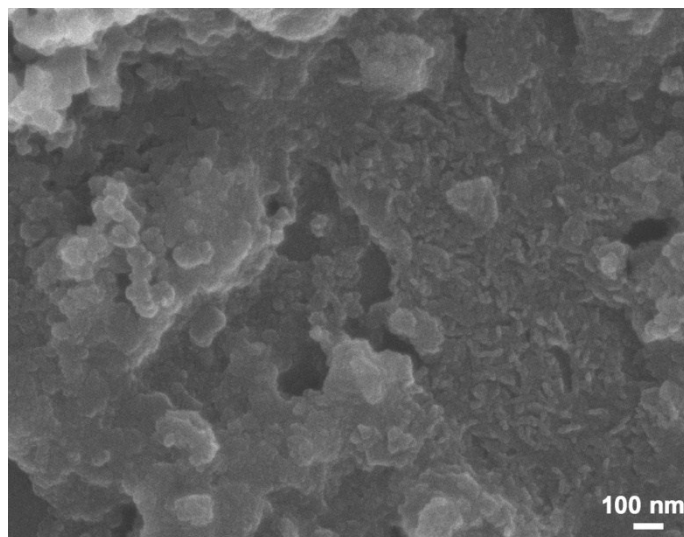

**Fig. S8** FE-SEM image of the CMS-rGO hybrid after 2000 cycles.

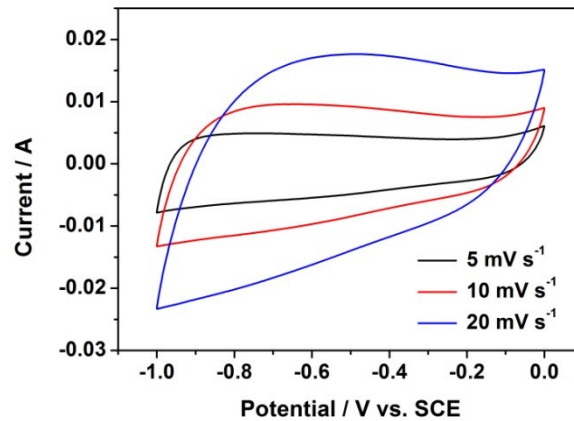

**Fig. S9** CV curves AC at the scanning rates of 5 mV s<sup>-1</sup>, 10 mV s<sup>-1</sup> and 20 mV s<sup>-1</sup>.

**Table S1** Comparison of the specific capacitance, rate retention, energy density and cycling stability based on Co<sub>3</sub>S<sub>4</sub>/CoMo<sub>2</sub>S<sub>4</sub>-rGO in present work and other reported work.

| Electrode material                                                                           | Specific capacitance                              | Rate retention                       | Energy density                                           | Cycling stability                                | Reference |
|----------------------------------------------------------------------------------------------|---------------------------------------------------|--------------------------------------|----------------------------------------------------------|--------------------------------------------------|-----------|
| Co <sub>3</sub> S <sub>4</sub> /CoMo <sub>2</sub> S <sub>4</sub> ultrathin nanosheets on rGO | 1457.8 F g <sup>-1</sup> at 1 A g <sup>-1</sup>   | 45.1%<br>1 to 20 A g <sup>-1</sup>   | 33.1 Wh kg <sup>-1</sup><br>at 0.85 kW kg <sup>-1</sup>  | 93.8%<br>5000 cycles                             | This work |
| Amorphous CoMoS <sub>4</sub>                                                                 | 661 F g <sup>-1</sup> at 1 A g <sup>-1</sup>      | 62%<br>1 to 3 A g <sup>-1</sup>      | 27.2 Wh kg <sup>-1</sup><br>at 0.4 kW kg <sup>-1</sup>   | 86%<br>10000 cycles                              | 1         |
| NiMoO <sub>4</sub> nanotubes                                                                 | 864 F g <sup>-1</sup> at 1 A g <sup>-1</sup>      | 70%<br>1 to 4 A g <sup>-1</sup>      | /                                                        | 71%<br>1000 cycles<br>(three-electrode system)   | 2         |
| MoS <sub>2</sub> nanosheets on N-doped graphene                                              | 245 F g <sup>-1</sup> at 0.25 A g <sup>-1</sup>   | 59%<br>0.25 to 20 A g <sup>-1</sup>  | /                                                        | 91.3%<br>1000 cycles<br>(three-electrode system) | 3         |
| Porous Co <sub>9</sub> S <sub>8</sub> nanostructures on carbon fiber                         | 1056 F g <sup>-1</sup> at 5 mV s <sup>-1</sup>    | 43%<br>5 to 50 mV s <sup>-1</sup>    | 31.4 Wh kg <sup>-1</sup><br>at 0.2 kW kg <sup>-1</sup>   | 90%<br>5000 cycles                               | 4         |
| NiCo <sub>2</sub> S <sub>4</sub> @MnO <sub>2</sub> heterostructures                          | 1337.8 F g <sup>-1</sup> at 2 A g <sup>-1</sup>   | 44%<br>2 to 20 A g <sup>-1</sup>     | /                                                        | 82%<br>2000 cycles<br>(three-electrode system)   | 5         |
| NiCo <sub>2</sub> S <sub>4</sub> @ polypyrrole core-shell heterostructure                    | 9.781 F cm <sup>-2</sup> at 5 mA cm <sup>-2</sup> | 61.5%<br>5 to 50 mA cm <sup>-2</sup> | 34.62 Wh kg <sup>-1</sup><br>at 0.12 kW kg <sup>-1</sup> | 80.64%<br>2500 cycles                            | 6         |
| NiCo <sub>2</sub> S <sub>4</sub> arrays on carbon fiber paper                                | 1154 F g <sup>-1</sup> at 1 A g <sup>-1</sup>     | 62%<br>1 to 20 A g <sup>-1</sup>     | 17.3 Wh kg <sup>-1</sup><br>at 0.28 kW kg <sup>-1</sup>  | 107%<br>8000 cycles                              | 7         |

## Notes and references

- 1 X. Xu, Y. Song, R. Xue, J. Zhou, J. Gao and F. Xing, *Chem. Eng. J.*, 2016, **301**, 266-275.
- 2 Z. Yin, S. Zhang, Y. Chen, P. Gao, C. Zhu, P. Yang and L. Qi, *J. Mater. Chem. A*, 2015, **3**, 739-745.
- 3 B. Xie, Y. Chen, M. Yu, T. Sun, L. Lu, T. Xie, Y. Zhang and Y. Wu, *Carbon*, 2016, **99**, 35-42.
- 4 R. B. Rakhi, N. A. Alhebshi, D. H. Anjum and H. N. Alshareef, *J. Mater. Chem. A*, 2014, **2**, 16190-16198.
- 5 J. Yang, M. Ma, C. Sun, Y. Zhang, W. Huang and X. Dong, *J. Mater. Chem. A*, 2015, **3**, 1258-1264.
- 6 M. Yan, Y. Yao, J. Wen, L. Long, M. Kong, G. Zhang, X. Liao, G. Yin and Z. Huang, *ACS appl. mater. interfaces*, 2016, **8**, 24525-24535.
- 7 X. Xiong, G. Waller, D. Ding, D. Chen, B. Rainwater, B. Zhao, Z. Wang and M. Liu, *Nano Energy*, 2015, **16**, 71-80.
